# Supplementary material
Source: Springer Nature journal article supplement (https://www.springermedizin.de/resource/supplementary/13075_2011_3465_MOESM1_ESM.pdf/9694208)
Supplement: MOESM1 [file 9694208]

Potentially relevant abstracts (1551) identified for retrieval based on systematic search in Datastar (Embase, Medline, Medline in progress) and Cochrane RCT Library.

**Abstracts excluded (1434)**

Not randomized controlled trials (757)  
Not rheumatoid arthritis patients (220)  
Not adult patient population (61)  
Intervention or comparison out of scope (219)  
Outcome not of interest (161)  
Other (16)

Potentially relevant full text publications (117)

**Full text publications excluded (96)**

Study design out of scope (25)  
Outcomes not of interest (28)  
Population out of scope (26)  
Intervention out of scope (8)  
Other (7)  
Studies pending (2)

Abstracts (5), reports (2) and submissions (1) identified from other information sources:  
NICE, BMS, ACR and EULAR

**Included for data extraction (29):**

Full publications (21), clinical study reports (2: AIM and ATTEST), Certolizumab submission (1), abstracts (5)

**Final RCTs included (16):**

Abatacept (3), Etanercept (2), Golimumab (1), Infliximab (2), Adalimumab (2), Certolizumab (2), Rituximab (3), Tocilizumab (2).

*1 RCT contains both abatacept and infliximab  
Two studies were only available in abstract format*
